# Supplementary material for: Atomically resolved orientational ordering of C60molecules on epitaxial graphene on Cu(111)
Source: Royal Society of Chemistry journal article supplement (doi:10.1039/c4nr03249g), 2014-01-01
Supplement: c4nr03249g1.pdf [file c4nr03249g1.pdf]

## Supplementary Information for

# Atomically resolved orientational ordering of C<sub>60</sub> molecules on epitaxial graphene on Cu(111)

*Minbok Jung,<sup>ab</sup> Dongbin Shin,<sup>c</sup> So-Dam Sohn,<sup>ab</sup> Soon-Yong Kwon,<sup>a</sup> Noejung Park<sup>c</sup>, and Hyung-Joon Shin<sup>ab\*</sup>*

<sup>a</sup> School of Materials Science and Engineering, Center for Multidimensional Carbon Materials, and Low Dimensional Carbon Materials Center, Ulsan National Institute of Science and Technology (UNIST), UNIST-gil 50, Ulsan 689-798, Republic of Korea

<sup>b</sup> KIST-UNIST Ulsan Center for Convergent Materials, Ulsan National Institute of Science and Technology (UNIST), UNIST-gil 50, Ulsan 689-798, Republic of Korea

<sup>c</sup> Department of Physics, Center for Multidimensional Carbon Materials and Low Dimensional Carbon Materials Center, Ulsan National Institute of Science and Technology (UNIST), UNIST-gil 50, Ulsan 689-798, Republic of Korea

\* Authors to whom correspondence should be addressed.

Tel.: +82-52-217-2329

Fax: +82-52-217-2309

E-mail address: [shinhj@unist.ac.kr](mailto:shinhj@unist.ac.kr) (H.J.Shin)

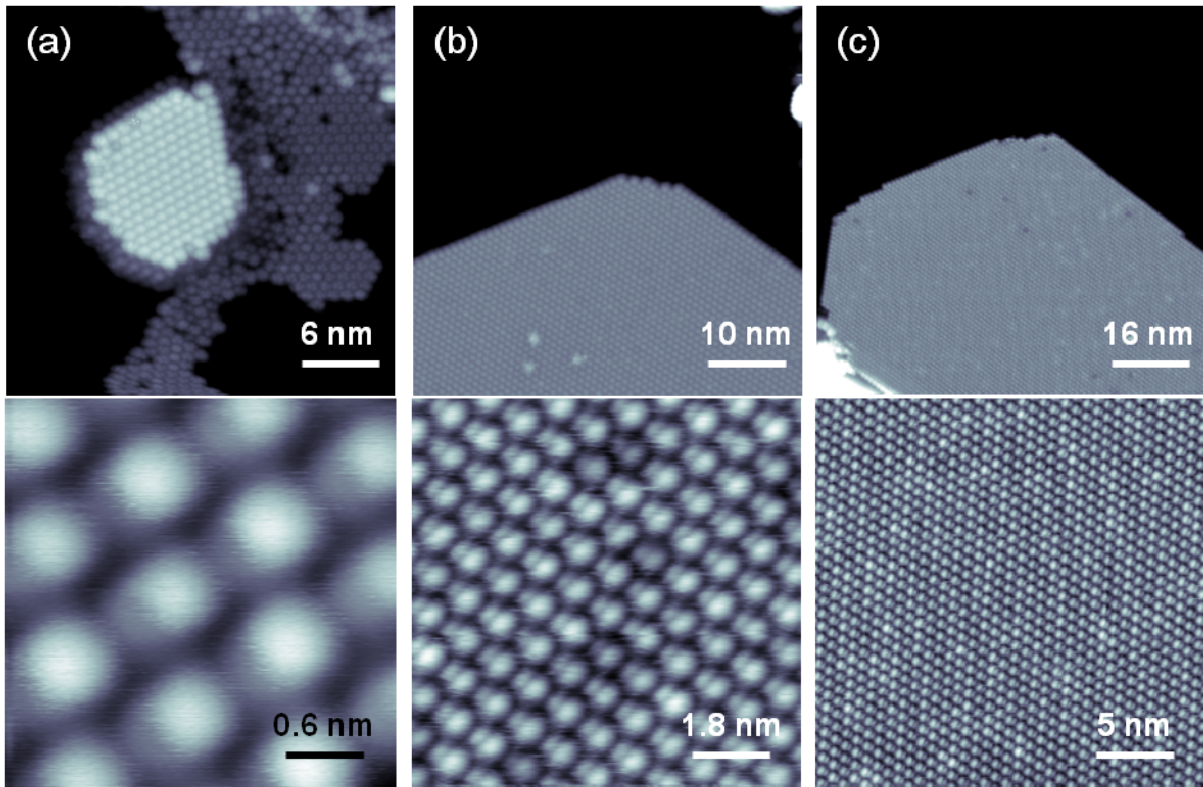

**Fig. S1** Self-assembled fullerene islands of various sizes. (a)  $V_{sample} = 1.5$  V and  $I_t = 50$  pA, (b)  $V_{sample} = 2.0$  V and  $I_t = 50$  pA, and (c)  $V_{sample} = 1.5$  V and  $I_t = 50$  pA. The bottom images are magnified images of the upper ones.
